# Supplementary material for: Prevalence and social drivers of HIV among married and cohabitating heterosexual adults in south-eastern Tanzania: analysis of adult health community cohort data
Source: PubMed Central journal article supplement (PMC4592501; doi:10.3402/gha.v8.28941), 2015-09-30
Supplement: GHA-8-28941-s001.pdf [file GHA-8-28941-s001.pdf]

Table 1a. Characteristics of the study population, by sex : frequency distribution (n = 3,737 \*\*)

| Variable                                       | ALL                       |              | Male                       |             | Female                       |             |
|------------------------------------------------|---------------------------|--------------|----------------------------|-------------|------------------------------|-------------|
|                                                | Number of all respondents | Percent (%)  | Number of male respondents | Percent (%) | Number of female respondents | Percent (%) |
| <b>TOTAL</b>                                   | <b>3,988</b>              | <b>100.0</b> | <b>1,340</b>               | <b>33.6</b> | <b>2,648</b>                 | <b>66.4</b> |
| <i>Social and demographic characteristics</i>  |                           |              |                            |             |                              |             |
| <i>Sex</i>                                     |                           |              |                            |             |                              |             |
| Male                                           | 1,340                     | 33.6         | 1,340                      | 100.0       | NA                           | NA          |
| Female                                         | 2,648                     | 66.4         | NA                         | NA          | 2,648                        | 100.0       |
| <i>Age (years)*</i>                            |                           |              |                            |             |                              |             |
| ≤20                                            | 175                       | 4.4          | 6                          | 0.5         | 169                          | 6.4         |
| 21-30                                          | 1,265                     | 31.8         | 234                        | 17.5        | 1,031                        | 39.0        |
| 31-40                                          | 1,159                     | 29.1         | 416                        | 31.1        | 743                          | 28.1        |
| 41-50                                          | 613                       | 15.4         | 247                        | 18.5        | 366                          | 13.8        |
| 50+                                            | 770                       | 19.3         | 434                        | 32.5        | 336                          | 12.7        |
| Mean = 38.4, SD = 14.5, Min = 13, Max = 99     |                           |              |                            |             |                              |             |
| <i>Performs any income-generating activity</i> |                           |              |                            |             |                              |             |
| Yes                                            | 2,909                     | 72.9         | 1,211                      | 90.4        | 1,698                        | 64.1        |
| No                                             | 1,079                     | 27.1         | 129                        | 9.6         | 950                          | 35.9        |
| <i>Ever had formal education?</i>              |                           |              |                            |             |                              |             |
| Yes                                            | 3,494                     | 87.6         | 1,245                      | 92.9        | 2,249                        | 84.9        |
| No                                             | 494                       | 12.4         | 95                         | 7.1         | 399                          | 15.1        |
| <i>Religion</i>                                |                           |              |                            |             |                              |             |
| Muslim                                         | 1,559                     | 39.1         | 531                        | 39.6        | 1,028                        | 38.8        |
| Christian-Catholic                             | 2,087                     | 52.3         | 702                        | 52.4        | 1,385                        | 52.3        |
| Other Christian                                | 322                       | 8.1          | 99                         | 7.4         | 223                          | 8.4         |
| Other/none                                     | 20                        | 0.5          | 8                          | 0.6         | 12                           | 0.5         |
| <i>Ethnic group</i>                            |                           |              |                            |             |                              |             |
| Northern Western                               | 307                       | 7.7          | 113                        | 8.4         | 194                          | 7.3         |
| Northern Eastern                               | 133                       | 3.3          | 59                         | 4.4         | 74                           | 2.8         |
| Southern                                       | 3,548                     | 89.0         | 1,168                      | 87.2        | 2,380                        | 89.9        |
| <i>Marital characteristics</i>                 |                           |              |                            |             |                              |             |
| <i>Re-married?</i>                             |                           |              |                            |             |                              |             |
| Yes                                            | 674                       | 16.9         | 251                        | 18.7        | 423                          | 16.0        |
| No                                             | 3,314                     | 83.1         | 1,089                      | 81.3        | 2,225                        | 84.0        |
| <i>Sexual behavior characteristics</i>         |                           |              |                            |             |                              |             |
| <i>Life-time number of sexual partners*</i>    |                           |              |                            |             |                              |             |
| 1                                              | 901                       | 24.1         | 125                        | 10.1        | 776                          | 31.1        |
| 2-4                                            | 1,837                     | 49.2         | 490                        | 39.6        | 1,347                        | 53.9        |
| 5+                                             | 999                       | 26.7         | 624                        | 50.4        | 375                          | 15.0        |
| Mean = 4.6, SD = 7.2, Min = 1, Max = 100       |                           |              |                            |             |                              |             |

|                                  |       |      |       |      |       |      |
|----------------------------------|-------|------|-------|------|-------|------|
| <i>Gender norms</i>              |       |      |       |      |       |      |
| Woman's status                   |       |      |       |      |       |      |
| Yes                              | 3,454 | 86.6 | 1,158 | 86.4 | 2,296 | 86.7 |
| No                               | 534   | 13.4 | 182   | 13.6 | 352   | 13.3 |
| <i>Health care utilization</i>   |       |      |       |      |       |      |
| Condom use at first sex*         |       |      |       |      |       |      |
| Yes                              | 525   | 13.3 | 135   | 10.2 | 390   | 14.9 |
| No                               | 3,384 | 85.8 | 1,175 | 88.6 | 2,209 | 84.5 |
| Don't know                       | 33    | 0.8  | 17    | 1.3  | 16    | 0.6  |
| Ever had VCT?                    |       |      |       |      |       |      |
| Yes                              | 1,008 | 25.3 | 270   | 20.2 | 738   | 27.9 |
| No                               | 2,980 | 74.7 | 1,070 | 79.9 | 1,910 | 72.1 |
| <i>Lifestyle characteristics</i> |       |      |       |      |       |      |
| Ever drank alcohol?              |       |      |       |      |       |      |
| Yes                              | 1,103 | 27.7 | 582   | 43.4 | 521   | 19.7 |
| No                               | 2,885 | 72.3 | 758   | 56.6 | 2,127 | 80.3 |

\* Missing data for some respondents; NA = Not Applicable

\* \* Currently married men and women who participated in MZIMA adult health community cohort conducted in Ifakara, Tanzania

Table 2a. Prevalence of HIV by background characteristics: Sex aggregated data (n =3,737 <sup>A</sup>)

| Variable                                       | % HIV positive  |             |             |
|------------------------------------------------|-----------------|-------------|-------------|
|                                                | All respondents | Male        | Female      |
|                                                | n=3,988         | n=1,340     | n=2,648     |
| <b>OVERALL</b>                                 | <b>6.67</b>     | <b>5.90</b> | <b>7.06</b> |
| <i>Social demographic characteristics</i>      |                 |             |             |
| <i>Age (years)</i>                             |                 |             |             |
| ≤20                                            | 4.57            | 16.67       | 4.14        |
| 21-30                                          | 6.72            | 5.13        | 7.08        |
| 31-40                                          | 7.42            | 5.77        | 8.34        |
| 41-50                                          | 7.01            | 5.67        | 7.92        |
| 50+                                            | 5.71            | 6.45        | 4.76        |
| <i>Performs any income-generating activity</i> |                 |             |             |
| Yes                                            | 6.81            | 5.70        | 7.60        |
| No                                             | 6.30            | 7.75        | 6.11        |
| <i>Ever had formal education?</i>              |                 |             |             |
| Yes                                            | 6.41*           | 5.62        | 6.85        |
| No                                             | 8.50*           | 9.47        | 8.27        |
| <i>Religion</i>                                |                 |             |             |
| Muslim                                         | 7.31            | 7.16        | 7.39        |
| Christian-Catholic                             | 6.23            | 4.70        | 7.00        |
| Other Christian                                | 6.52            | 7.07        | 6.28        |
| Other/none                                     | 5.00            | 12.50       | 0.00        |
| <i>Ethnic group</i>                            |                 |             |             |
| Northern Western                               | 7.49            | 7.96        | 7.22        |
| Northern Eastern                               | 4.51            | 1.69        | 6.76        |
| Southern                                       |                 |             |             |
| <i>Marital characteristics</i>                 |                 |             |             |
| <i>Re-married?</i>                             |                 |             |             |
| Yes                                            | 9.79***         | 8.76**      | 10.40**     |
| No                                             | 6.04***         | 5.23**      | 6.43**      |
| <i>Sexual behavior characteristics</i>         |                 |             |             |
| <i>Life-time number of sexual partners</i>     |                 |             |             |
| 1                                              | 4.88*           | 7.20        | 4.51**      |
| 2-4                                            | 7.19*           | 6.33        | 7.50**      |
| 5+                                             |                 |             |             |
| <i>Gender norms</i>                            |                 |             |             |
| <i>Woman's status</i>                          |                 |             |             |
| Yes                                            | 6.40*           | 5.53        | 6.84        |
| No                                             |                 |             |             |
| <i>Health care utilization</i>                 |                 |             |             |
| <i>Condom use at first sex</i>                 |                 |             |             |
| Yes                                            | 6.10            | 8.89        | 5.13        |
| No                                             | 6.86            | 5.70        | 7.47        |
| Don't know                                     | 0.00            | 0.00        | 0.00        |
| <i>Ever had VCT?</i>                           |                 |             |             |
| Yes                                            | 7.84*           | 5.19        | 8.81**      |
| No                                             | 6.28*           | 6.07        | 6.39**      |

*Lifestyle characteristics*

Ever drank alcohol?

|     |      |      |       |
|-----|------|------|-------|
| Yes | 7.25 | 5.67 | 9.02* |
| No  | 6.45 | 6.07 | 6.58* |

---

\*\*\*P<0.001, \*\*P<0.050, \*P<0.100

<sup>A</sup> Currently married men and women who participated in MZIMA adult health community cohort sex- aggregated data

---

1  
2
